# Supplementary material for: Spatial Distribution and Pollution Assessment of Potentially Toxic Elements (PTEs) in Surface Sediments at the Drinking Water Source Channel of Taipu River in China
Source: MDPI journal article supplement (doi:10.3390/min11111202), 2021-10-28
Supplement: s1 [file s1]

Supplementary Material

# Spatial Distribution and Pollution Assessment of Potentially Toxic Elements (PTEs) in Surface Sediments at the Drinking Water Source Channel of Taipu River in China

**Table S1.** Pollution grades of the geoaccumulation index ( $I_{geo}$ ).

| Grade | Value                | Degree of Pollution               |
|-------|----------------------|-----------------------------------|
| 0     | $I_{geo} \leq 0$     | unpolluted                        |
| 1     | $0 < I_{geo} \leq 1$ | unpolluted to moderately polluted |
| 2     | $1 < I_{geo} \leq 2$ | moderately polluted               |
| 3     | $2 < I_{geo} \leq 3$ | moderately to severely polluted   |
| 4     | $3 < I_{geo} \leq 4$ | severely polluted                 |
| 5     | $4 < I_{geo} \leq 5$ | extremely severely polluted       |
| 6     | $5 < I_{geo}$        | and extremely polluted            |

**Table S2.** ( $EF$ ) of different levels.

| $EF$    | Levels                       |
|---------|------------------------------|
| 0-1.0   | No enrichment                |
| 1.0-3.0 | Minor enrichment             |
| 3.0-5.0 | Moderate enrichment          |
| 5.0-10  | Moderately severe enrichment |
| 10-25   | Severe enrichment            |
| 25-50   | Very severe enrichment;      |
| >50     | Extremely severe enrichment  |

**Table S3.** The categories of potential ecological risk represented by  $E_r^i$  and  $RI$ .

| $E_r^i$                | Individual ecological risk | $RI$                | Potential ecological risk to the environment |
|------------------------|----------------------------|---------------------|----------------------------------------------|
| $E_r^i < 30$           | Low risk                   | $RI < 80$           | Low risk                                     |
| $30 \leq E_r^i < 60$   | Moderate risk              | $80 \leq RI < 160$  | Moderate risk                                |
| $60 \leq E_r^i < 120$  | Considerable risk          | $160 \leq RI < 320$ | Considerable risk                            |
| $120 \leq E_r^i < 240$ | High risk                  | $RI \geq 320$       | High risk                                    |
| $E_r^i \geq 240$       | Extremely high risk        |                     |                                              |

**Table S4.** Heavy metal content in surface sediments of Taipu river (mg / kg).

|                                                                          | Cr   | Ni    | Cu    | Zn    | Mo    | Cd    | Tl    | Pb    | V     | Co    | As    | Sb   |
|--------------------------------------------------------------------------|------|-------|-------|-------|-------|-------|-------|-------|-------|-------|-------|------|
| TP1                                                                      | 42.7 | 16.26 | 13.52 | 44.0  | 0.306 | 0.106 | 0.350 | 16.02 | 57.5  | 8.51  | 5.96  | 42.7 |
| TP2                                                                      | 60.6 | 27.1  | 18.4  | 71.2  | 0.721 | 0.086 | 0.422 | 17.4  | 77.3  | 11.54 | 6.74  | 60.6 |
| TP3                                                                      | 62.0 | 29.7  | 31.0  | 121.9 | 0.661 | 0.162 | 0.499 | 25.3  | 85.2  | 13.89 | 11.38 | 62.0 |
| TP4                                                                      | 56.4 | 27.9  | 19.2  | 62.4  | 0.255 | 0.072 | 0.434 | 16.06 | 77.2  | 12.74 | 9.46  | 56.4 |
| TP5                                                                      | 57.4 | 28.1  | 29.7  | 121.0 | 0.963 | 0.246 | 0.508 | 27.5  | 78.1  | 12.58 | 10.56 | 57.4 |
| TP6                                                                      | 37.5 | 12.15 | 9.26  | 32.3  | 0.224 | 0.029 | 0.306 | 12.59 | 46.6  | 5.87  | 2.70  | 37.5 |
| TP7                                                                      | 51.5 | 24.8  | 24.7  | 76.8  | 0.385 | 0.123 | 0.401 | 19.6  | 68.5  | 11.24 | 8.33  | 51.4 |
| TP8                                                                      | 66.1 | 33.3  | 35.9  | 143.1 | 0.802 | 0.455 | 0.527 | 27.4  | 88.2  | 14.45 | 10.46 | 66.1 |
| TP9                                                                      | 73.9 | 36.5  | 50.8  | 104.5 | 0.651 | 0.138 | 0.524 | 24.8  | 96.0  | 14.69 | 9.29  | 73.9 |
| TP10                                                                     | 35.6 | 10.88 | 8.53  | 33.8  | 0.302 | 0.021 | 0.291 | 12.03 | 45.8  | 6.38  | 3.40  | 35.6 |
| TP11                                                                     | 44.9 | 33.4  | 130.2 | 48.6  | 0.457 | 0.088 | 0.336 | 15.53 | 55.9  | 14.24 | 5.14  | 44.9 |
| TP12                                                                     | 39.0 | 13.71 | 12.16 | 26.8  | 0.222 | 0.043 | 0.301 | 12.62 | 53.5  | 5.48  | 3.50  | 39.0 |
| TP13                                                                     | 85.4 | 46.7  | 39.4  | 98.8  | 0.519 | 0.184 | 0.617 | 26.9  | 116.5 | 18.9  | 22.48 | 85.3 |
| TP14                                                                     | 50.9 | 21.7  | 24.0  | 59.0  | 0.307 | 0.069 | 0.402 | 16.25 | 65.8  | 9.89  | 4.93  | 50.9 |
| TP15                                                                     | 62.0 | 29.2  | 24.3  | 67.1  | 0.433 | 0.077 | 0.431 | 18.7  | 76.5  | 12.46 | 9.37  | 62.0 |
| TP16                                                                     | 57.9 | 27.4  | 20.6  | 61.8  | 0.285 | 0.081 | 0.423 | 16.67 | 77.1  | 11.91 | 7.02  | 57.9 |
| TP17                                                                     | 66.5 | 33.1  | 25.0  | 64.8  | 0.502 | 0.067 | 0.519 | 21.1  | 91.8  | 13.33 | 13.54 | 66.5 |
| TP18                                                                     | 71.0 | 37.6  | 26.6  | 82.6  | 0.312 | 0.070 | 0.563 | 21.1  | 100.0 | 14.11 | 10.91 | 71.0 |
| TP19                                                                     | 66.5 | 32.3  | 21.4  | 69.2  | 0.374 | 0.065 | 0.508 | 19.8  | 88.9  | 13.85 | 7.68  | 66.5 |
| TP20                                                                     | 65.7 | 33.1  | 23.3  | 57.3  | 0.465 | 0.072 | 0.528 | 18.4  | 92.7  | 13.00 | 11.30 | 65.7 |
| TP21                                                                     | 55.0 | 23.1  | 16.05 | 57.4  | 0.391 | 0.048 | 0.387 | 17.3  | 71.4  | 9.15  | 6.59  | 55.0 |
| TP22                                                                     | 54.3 | 24.9  | 27.4  | 91.2  | 0.671 | 0.128 | 0.361 | 20.1  | 68.8  | 11.91 | 7.89  | 54.3 |
| TP23                                                                     | 54.3 | 21.2  | 11.52 | 46.8  | 0.235 | 0.035 | 0.329 | 14.78 | 66.9  | 8.49  | 3.02  | 54.3 |
| TP24                                                                     | 70.9 | 33.5  | 22.1  | 68.8  | 0.471 | 0.084 | 0.489 | 20.3  | 94.5  | 13.24 | 8.87  | 70.9 |
| TP25                                                                     | 66.3 | 31.1  | 21.2  | 75.3  | 0.522 | 0.118 | 0.421 | 18.4  | 86.6  | 12.66 | 9.20  | 66.3 |
| <b>Xiashu Loess<br/>background<br/>value in Taihu<br/>Lake Basin [1]</b> | 79.3 | 15.7  | 18.9  | 59.15 | /     | /     | /     | 19.5  | /     | 15.6  | 9.4   | /    |

**Table S5.** The content of PTEs in the surface sediments of the Taipu River and other rivers in the study (mg/kg).

| Area               | Cr    | Ni    | Cu    | Zn    | Cd    | Pb    | V     | Co    | As    | Sb   | References |
|--------------------|-------|-------|-------|-------|-------|-------|-------|-------|-------|------|------------|
| Taipu River        | 58.2  | 27.6  | 27.5  | 71.7  | 0.107 | 19.1  | 77.1  | 11.80 | 8.40  | 1.01 | this study |
| Taipu River (2016) | 87.2  | 41.2  | 62.2  | -     | 0.740 | 34.9  | 90.3  | 16.00 | -     | 7.74 | [37]       |
| Huangpu River      | -     | 34.4  | 40.2  | 139.7 | 2.20  | 68.6  | -     | 0     | 11.30 | 2.80 | [38]       |
| Xiangjiang River   | 120.4 | 57.1  | 101.4 | 443   | 13.68 | 215   | 117.0 | 23.2  | 54.9  | -    | [39]       |
| Zijiang River      | 67.5  | 34.7  | 34.2  | 141.9 | 3.00  | 35.7  | -     | -     | 31.5  | 36.6 | [40]       |
| Dadu River         | 158.7 | 65.8  | 77.1  | 137.0 | 2.80  | 48.4  | -     | -     | 23.1  | -    | [41]       |
| Jialu River        | 60.8  | 42.4  | 39.2  | 107.6 | 2.93  | 29.4  | -     | -     | 6.31  | -    | [42]       |
| Songhua River      | 121.4 | 12.89 | 13.33 | 92.5  | 0.270 | 18.8  | -     | -     | 10.13 | -    | [43]       |
| Haihe Basin        | 81.9  | 27.8  | 53.3  | 256   | 0.364 | 20.0  | --    | 13.40 | -     | -    | [44]       |
| Liaohe River       | 35.1  | 17.7  | 17.8  | 50.2  | 1.200 | 10.57 | -     | -     | 9.88  | -    | [31]       |
| Biliu Reservoir    | 42.9  | 32.4  | 31.0  | 84.3  | 0.132 | 24.7  | -     | -     | 7.30  | -    | [45]       |
| Bortala River      | 51.6  | 22.3  | 30.1  | 99.2  | 0.170 | 32.0  | -     | -     | 9.67  | -    | [46]       |
| Chenab River       | -     | -     | 8.16  | 33.7  | 1.67  | 18.1  | -     | 7.95  | -     | -    | [47]       |
| Vaigai River       | 69.0  | 41.5  | 44.7  | 164.2 | 1.010 | 69.3  | -     | -     | -     | -    | [48]       |
| Bangshi River      | 98.0  | 26.0  | 31.0  | -     | 0.610 | 60.0  | -     | -     | 1.93  | -    | [49]       |
| Somesu Mic River   | 22.6  | 26.6  | 32.6  | 97.7  | 0.160 | 35.5  |       |       | -     |      | [50]       |

**Note:** The missing values of Mo and Tl are due to references not mentioned.

**Table S6.** Correlation analysis of heavy metals and physicochemical properties in surface sediments of Taipu river (n=25).

|             | Cr      | Ni      | Cu     | Zn      | Mo      | Cd      | Tl      | Pb      | V       | Co      | As     | Sb     | pH       | TOC    | clay     | silt |
|-------------|---------|---------|--------|---------|---------|---------|---------|---------|---------|---------|--------|--------|----------|--------|----------|------|
| <b>Cr</b>   | 1       |         |        |         |         |         |         |         |         |         |        |        |          |        |          |      |
| <b>Ni</b>   | 0.918** | 1       |        |         |         |         |         |         |         |         |        |        |          |        |          |      |
| <b>Cu</b>   | 0.090   | 0.445*  | 1      |         |         |         |         |         |         |         |        |        |          |        |          |      |
| <b>Zn</b>   | 0.620** | 0.606** | 0.179  | 1       |         |         |         |         |         |         |        |        |          |        |          |      |
| <b>Mo</b>   | 0.428*  | 0.444*  | 0.259  | 0.830** | 1       |         |         |         |         |         |        |        |          |        |          |      |
| <b>Cd</b>   | 0.361   | 0.395   | 0.208  | 0.846** | 0.725** | 1       |         |         |         |         |        |        |          |        |          |      |
| <b>Tl</b>   | 0.913** | 0.875** | 0.097  | 0.698** | 0.484*  | 0.471*  | 1       |         |         |         |        |        |          |        |          |      |
| <b>Pb</b>   | 0.752** | 0.737** | 0.201  | 0.943** | 0.783** | 0.765** | 0.837** | 1       |         |         |        |        |          |        |          |      |
| <b>V</b>    | 0.987** | 0.912** | 0.060  | 0.616** | 0.404*  | 0.363   | 0.950** | 0.760** | 1       |         |        |        |          |        |          |      |
| <b>Co</b>   | 0.867** | 0.971** | 0.47*  | 0.688** | 0.519** | 0.482*  | 0.854** | 0.785** | 0.860** | 1       |        |        |          |        |          |      |
| <b>As</b>   | 0.819** | 0.822** | 0.128  | 0.602** | 0.433*  | 0.432*  | 0.860** | 0.769** | 0.854** | 0.832** | 1      |        |          |        |          |      |
| <b>Sb</b>   | 0.425*  | 0.427*  | 0.195  | 0.776** | 0.731** | 0.630** | 0.508** | 0.747** | 0.427*  | 0.475*  | 0.396* | 1      |          |        |          |      |
| <b>pH</b>   | 0.474*  | 0.266   | -0.360 | 0.038   | -0.018  | -0.212  | 0.203   | 0.018   | 0.411*  | 0.217   | 0.156  | -0.137 | 1        |        |          |      |
| <b>TOC</b>  | -0.383  | -0.206  | 0.405* | -0.264  | -0.105  | -0.066  | -0.362  | -0.263  | -0.373  | -0.243  | -0.280 | -0.289 | -0.512** | 1      |          |      |
| <b>clay</b> | 0.523*  | 0.440   | -0.157 | 0.034   | -0.046  | -0.169  | .567**  | 0.211   | 0.567** | 0.381   | 0.400  | 0.139  | 0.230    | -0.338 | 1        |      |
| <b>silt</b> | -0.464* | -.457*  | -0.099 | -0.066  | -0.071  | 0.009   | -0.422  | -0.204  | -0.438  | -0.408  | -0.302 | -0.170 | -0.176   | 0.135  | -0.709** | 1    |

\*\*. p&lt;0.01, \*. p&lt;0.05

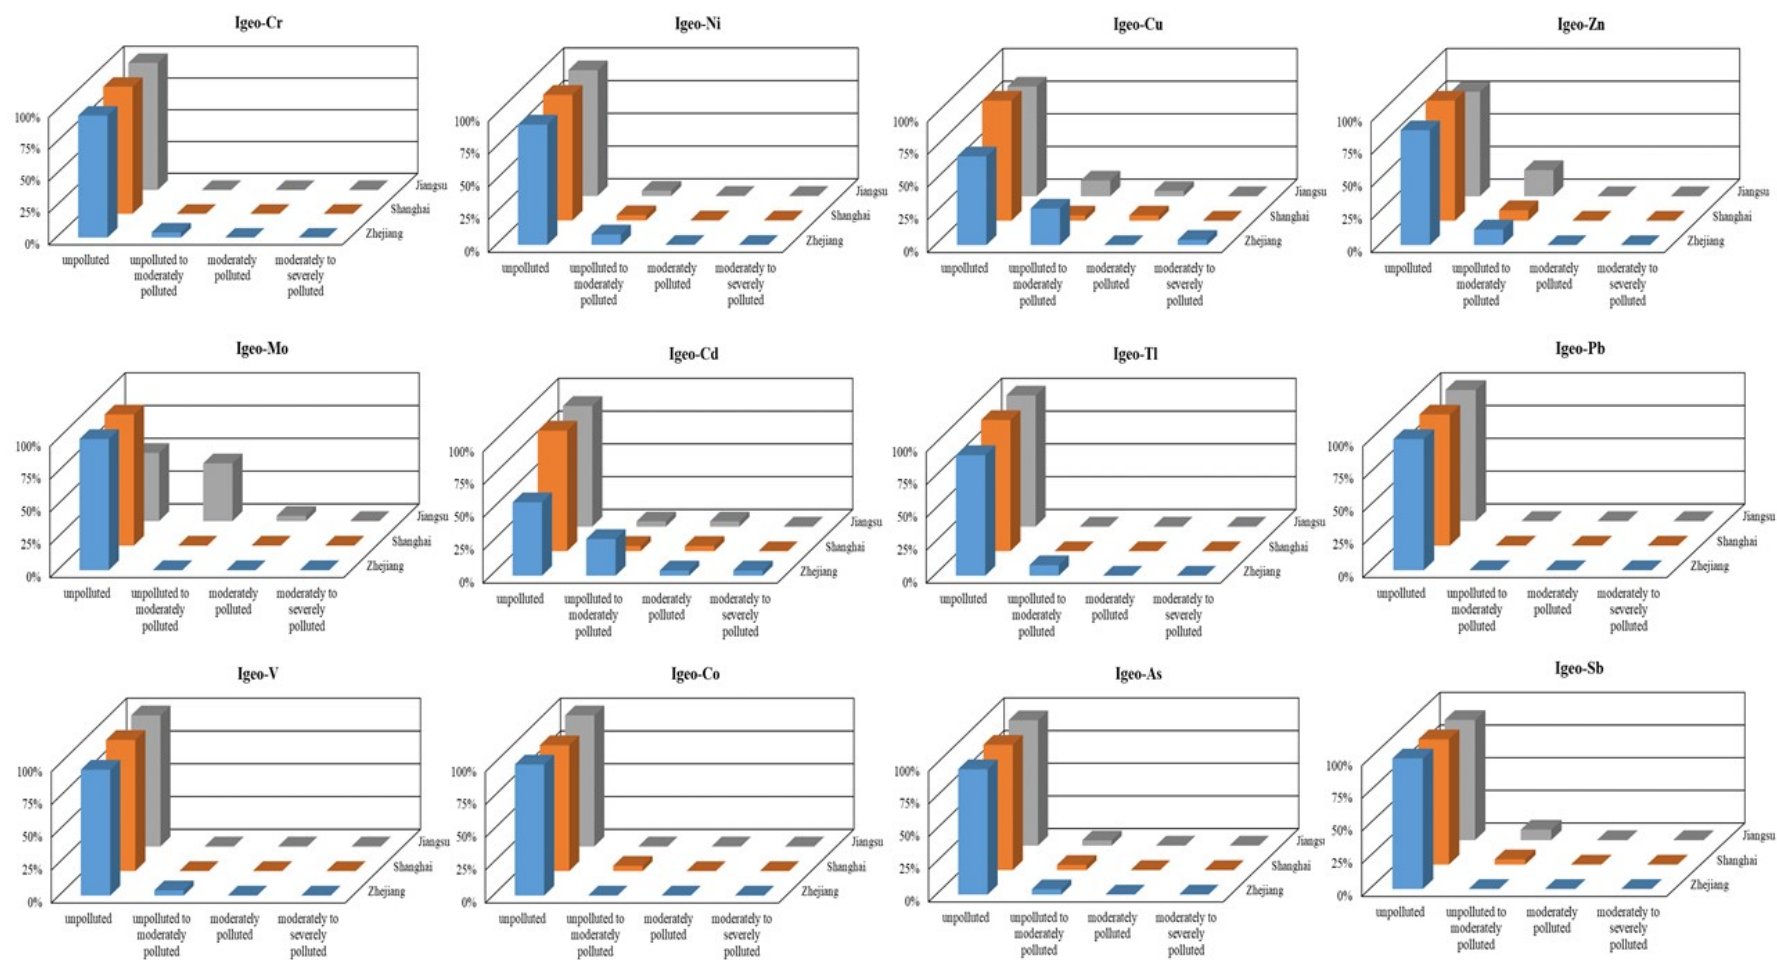

**Figure S1.** Percentage of different pollution grades of PTEs in the geoaccumulation index ( $I_{geo}$ ) of 25 surface sediments in three provinces (Zhejiang, Shanghai and Jiangsu Province) background values.

**Figure S2.** Percentage of different pollution grades of PTEs in the Enrichment factor ( $EF$ ) of 25 surface sediments in three provinces (Zhejiang, Shanghai and Jiangsu Province) background values.
